# Supplementary material
Source: bioRxiv or medRxiv preprint supplement (https://www.biorxiv.org/highwire/filestream/1717/field_highwire_adjunct_files/0/006932-1.pdf)

**A**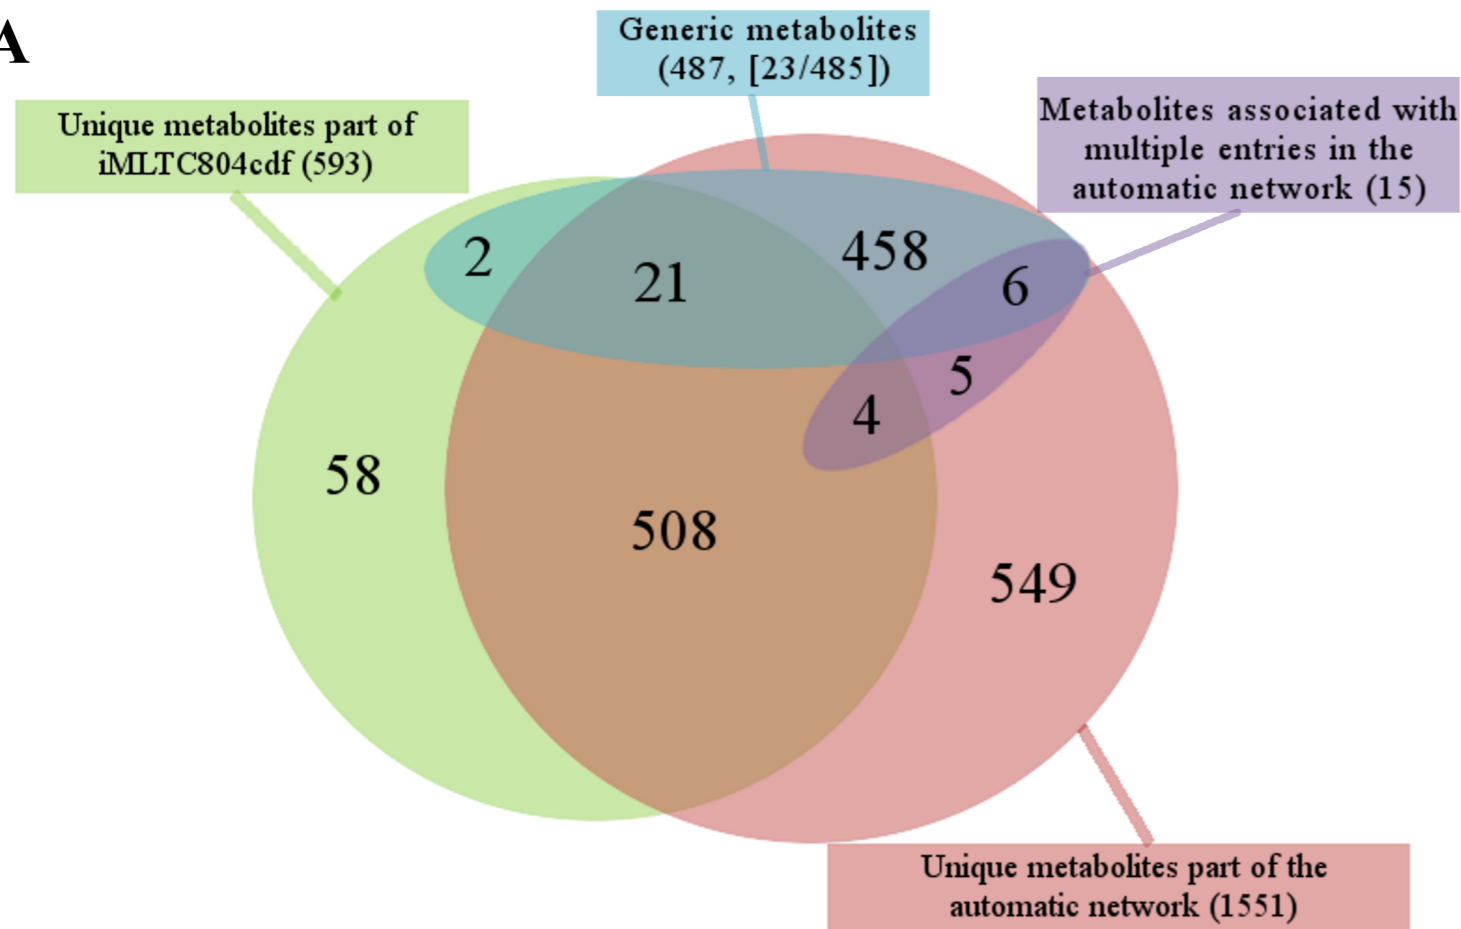**B**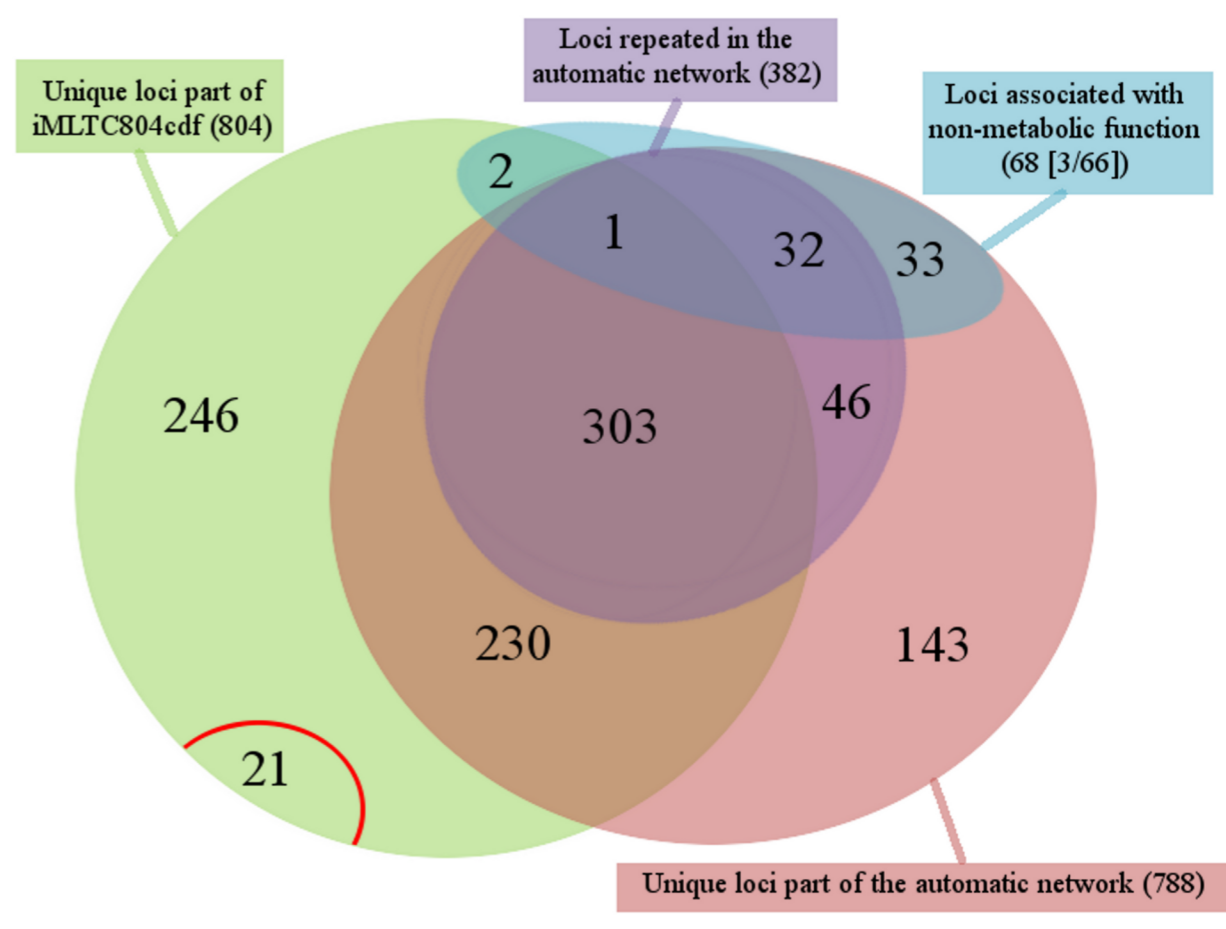

Supplement: Supplementary file [file 006932-1.pdf]
